# Supplementary material for: Efficiency of short-lived halogens at influencing climate through depletion of stratospheric ozone
Source: Springer Nature journal article supplement (doi:10.1038/ngeo2363), 2015-02-16
Supplement: 41561_2015_BFngeo2363_MOESM292_ESM.pdf [file 41561_2015_BFngeo2363_MOESM292_ESM.pdf]

# Efficiency of short-lived halogens at influencing climate through depletion of stratospheric ozone

R. Hossaini<sup>1\*</sup>, M. P. Chipperfield<sup>1</sup>, S. A. Montzka<sup>2</sup>, A. Rap<sup>1</sup>, S. Dhomse<sup>1</sup>, and W. Feng<sup>1,3</sup>

1. School of Earth and Environment, University of Leeds, Leeds, UK
2. National Oceanic and Atmospheric Administration, Boulder, USA
3. National Centre for Atmospheric Science, University of Leeds, Leeds, UK

\* Corresponding author ([r.hossaini@leeds.ac.uk](mailto:r.hossaini@leeds.ac.uk))

This supplement contains 4 tables and 3 figures. Table S1 gives a summary of model experiments and their design to examine the impact of halogens from VSLs in the stratosphere. Table S2 gives the calculated global mean radiative effect caused by VSLs-driven ozone perturbations. Table S3 gives a summary of additional model experiments that were performed to examine the impact of VSLs on ozone in the troposphere. Table S4 presents observed CH<sub>2</sub>Cl<sub>2</sub> mixing ratios at 13 surface locations from the ongoing monitoring program of the National Oceanic and Atmospheric Administration (NOAA) Earth System Research Laboratory (ESRL). Table S4 also contains the site-wise CH<sub>2</sub>Cl<sub>2</sub> growth rate over the 2010-2013 period along with hemispheric and global averages. Figure S1 shows the 2011 mean simulated ozone change due to VSLs in the troposphere. Figure S2 shows a comparison between long-term ozone anomalies from the TOMCAT model and TOMS/SBUV satellite data between 1985 and 2013. Finally, Figure S3 shows column O<sub>3</sub> changes due to bromine VSLs in 2011 and also in an atmosphere with a pre-industrial stratospheric halogen load.

**Table S1. Summary of stratospheric model experiments and halogen load from VSLS.** Experiments were designed to examine the individual and combined impact of halogens from VSLS on ozone.

| Experiment*          | VSLS Loading [ppt] ** |               |            | Comment                             |
|----------------------|-----------------------|---------------|------------|-------------------------------------|
|                      | Bromine (Br)          | Chlorine (Cl) | Iodine (I) |                                     |
| STRAT1 <sup>+</sup>  | 0                     | 0             | 0          | No VSLS, control run                |
| STRAT2 <sup>+</sup>  | 6                     | 0             | 0          | Br - best                           |
| STRAT3 <sup>+</sup>  | 3                     | 0             | 0          | Br - lower                          |
| STRAT4 <sup>+</sup>  | 8                     | 0             | 0          | Br - upper                          |
| STRAT5               | 6                     | 40            | 0          | Br - best<br>Cl - lower             |
| STRAT6               | 6                     | 80            | 0          | Br - best<br>Cl - best              |
| STRAT7               | 6                     | 130           | 0          | Br - best<br>Cl - upper             |
| STRAT8               | 6                     | 80            | 0.15       | Br - best<br>Cl - best<br>I - upper |
| STRAT9 <sup>^</sup>  | 3                     | 40            | 0          | All - lower                         |
| STRAT10 <sup>^</sup> | 8                     | 130           | 0.15       | All - upper                         |

Notes:

\* The model was run for the 1979-2013 period at a resolution of ~5.6° longitude by ~5.6° latitude and with 32 levels from the surface to ~60 km. Meteorological forcing data was taken from the European Centre for Medium-Range Weather Forecasts (ECMWF) ERA-Interim (6-hourly) reanalysis.

\*\* Range and best estimates based on the World Meteorological Organization Scientific Assessment of Ozone Depletion 2010. Upper limit of Cl encompasses the recent CH<sub>2</sub>Cl<sub>2</sub> trend.

+ In addition, also performed with a fixed pre-industrial stratospheric halogen load comprising background CH<sub>3</sub>Br and CH<sub>3</sub>Cl only.

<sup>^</sup> Extreme ranges used to determine the uncertainty on O<sub>3</sub> changes and RE due to VSLS.

**Table S2. Radiative effect (RE) due to VSLS-driven O<sub>3</sub> perturbations.** Net RE (longwave + shortwave) reported as global mean area-weighted averages for 2011 (Wm<sup>-2</sup>). Range shown in brackets is due to uncertainty in VSLS loading.

|              | VSLS halogen                         | Global Mean RE [Wm <sup>-2</sup> ] |
|--------------|--------------------------------------|------------------------------------|
| Stratosphere | Bromine                              | -0.07 (-0.035 to -0.096)           |
|              | Chlorine                             | -0.007 (-0.004 to -0.011)          |
|              | Iodine                               | < -0.003                           |
|              | <b>Combined stratosphere</b>         | <b>-0.08 (-0.04 to -0.11)</b>      |
| Troposphere  | Chlorine                             | Negligible                         |
|              | Bromine & Iodine                     | -0.12                              |
|              | <i>Bromine &amp; Iodine [ref 23]</i> | ~ -0.1                             |
|              | <b>Combined troposphere</b>          | <b>-0.12</b>                       |
|              | <b>Whole atmosphere</b>              | <b>-0.20 (-0.16 to -0.23)</b>      |

**Table S3. Summary of tropospheric model experiments.** Experiments were designed to examine the individual and combined impact of halogens from VSLS on ozone.

| Experiment*  | Inclusion of VSLS** |               |            | Comment      |
|--------------|---------------------|---------------|------------|--------------|
|              | Bromine (Br)        | Chlorine (Cl) | Iodine (I) |              |
| <b>TROP1</b> | No                  | No            | No         | No VSLS      |
| <b>TROP2</b> | Yes                 | No            | No         | Br only      |
| <b>TROP3</b> | Yes                 | Yes           | No         | Br and Cl    |
| <b>TROP4</b> | Yes                 | Yes           | Yes        | Br, Cl and I |

Notes:

\* The model was run for the 2009 to 2013 period at a resolution of ~2.8° longitude by ~2.8° latitude and with 31 levels from the surface to ~30 km. Meteorological forcing data was taken from the ECMWF ERA-Interim (6-hourly) reanalysis.

\*\* The tropospheric configuration of the TOMCAT model considers explicit emissions<sup>S4-5</sup> of the following VSLS: CHBr<sub>3</sub>, CH<sub>2</sub>Br<sub>2</sub>, CHBr<sub>2</sub>Cl, CH<sub>2</sub>BrCl, CHBrCl<sub>2</sub>, CH<sub>3</sub>I, CH<sub>2</sub>I<sub>2</sub>, CH<sub>2</sub>ICl, CH<sub>2</sub>IBr, C<sub>2</sub>H<sub>5</sub>I and C<sub>3</sub>H<sub>7</sub>I. A latitude-dependent mixing ratio boundary condition, derived from available global surface observations, was used to constrain the abundance of CHCl<sub>3</sub>, CH<sub>2</sub>Cl<sub>2</sub>, CH<sub>2</sub>ClCH<sub>2</sub>Cl, C<sub>2</sub>HCl<sub>3</sub> and C<sub>2</sub>Cl<sub>4</sub> in the model. TOMCAT has been used extensively for previous studies of tropospheric halogen chemistry<sup>S1</sup> and studies examining the emission<sup>S2</sup>, transport and chemistry of VSLS<sup>S3</sup>. The above model configuration has been shown previously to perform well in reproducing atmospheric observations of a range of VSLS in the troposphere<sup>S2-3</sup>.

**Table S4. Observed surface mixing ratio (ppt) and growth rate of CH<sub>2</sub>Cl<sub>2</sub>.** Observations made as part of the ongoing National Oceanic and Atmospheric Administration Earth System Research Laboratory (NOAA/ESRL) monitoring program. Average growth rates at all sites calculated between 2010-2013.

| Monitoring Site                 | Annual Mean Mixing Ratio [ppt] |             |             |             | Growth Rate          |                    |
|---------------------------------|--------------------------------|-------------|-------------|-------------|----------------------|--------------------|
|                                 | 2010                           | 2011        | 2012        | 2013        | ppt yr <sup>-1</sup> | % yr <sup>-1</sup> |
| Alert, NW Territories, Canada*  | 46.0                           | 47.0        | 48.1        | 59.6        | 4.5                  | 8.6                |
| Summit, Greenland               | 46.8                           | 45.7        | 47.5        | 60.2        | 4.5                  | 8.4                |
| Pt. Barrow, Alaska, USA*        | 46.5                           | 46.3        | 48.2        | 59.8        | 4.4                  | 8.4                |
| Mace Head, Ireland              | 46.7                           | 45.7        | 48.1        | 58.9        | 4.1                  | 7.8                |
| Wisconsin, USA                  | 48.8                           | 48.4        | 52.0        | 62.0        | 4.4                  | 8.0                |
| Trinidad Head, USA              | 48.6                           | 48.6        | 49.7        | 61.5        | 4.3                  | 7.9                |
| Niwot Ridge, Colorado, USA*     | 44.0                           | 45.7        | 50.7        | 60.3        | 5.4                  | 10.5               |
| Cape Kumukahi, Hawaii, USA*     | 42.9                           | 42.3        | 45.0        | 53.9        | 3.7                  | 7.6                |
| Mauna Loa, Hawaii, USA*         | 39.2                           | 37.4        | 41.9        | 52.0        | 4.3                  | 9.4                |
| Cape Matatula, American Samoa*  | 14.9                           | 15.6        | 16.4        | 19.3        | 1.4                  | 8.5                |
| Cape Grim, Tasmania, Australia* | 13.1                           | 13.7        | 14.3        | 15.6        | 0.9                  | 6.0                |
| Palmer Station, Antarctica      | 12.7                           | 13.4        | 13.4        | 15.3        | 0.9                  | 6.3                |
| South Pole*                     | 12.1                           | 13.3        | 13.3        | 14.2        | 0.7                  | 5.4                |
| Northern Hemisphere             | 43.7                           | 43.7        | 46.8        | 57.1        | 4.5                  | 8.9                |
| Southern Hemisphere             | 13.4                           | 14.2        | 14.7        | 16.4        | 1.0                  | 6.8                |
| <b>All site average</b>         | <b>35.5</b>                    | <b>35.6</b> | <b>37.6</b> | <b>45.6</b> | <b>3.3</b>           | <b>8.3</b>         |

Notes:

\* Sites used in estimating hemispheric mean mixing ratios in Table S3 and in Figure 3.

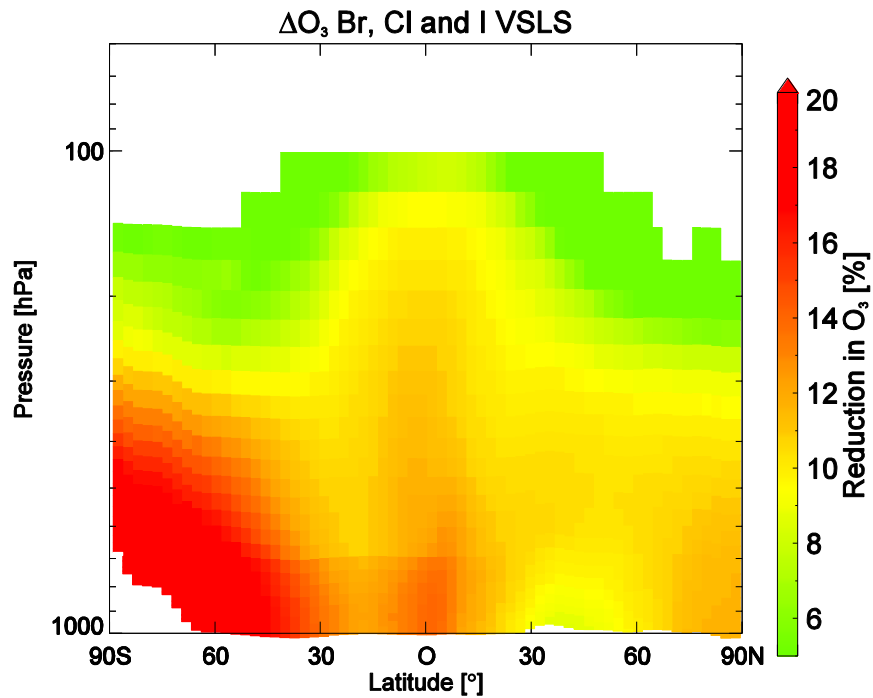

**Figure S1. Impact of VLSL on tropospheric ozone.** Simulated  $O_3$  reduction (%) due to combined influence of bromine, chlorine and iodine from VLSL in 2011 (relative to a control run with no VLSL). The impact of chlorine VLSL on tropospheric ozone is here negligible (<0.5%).

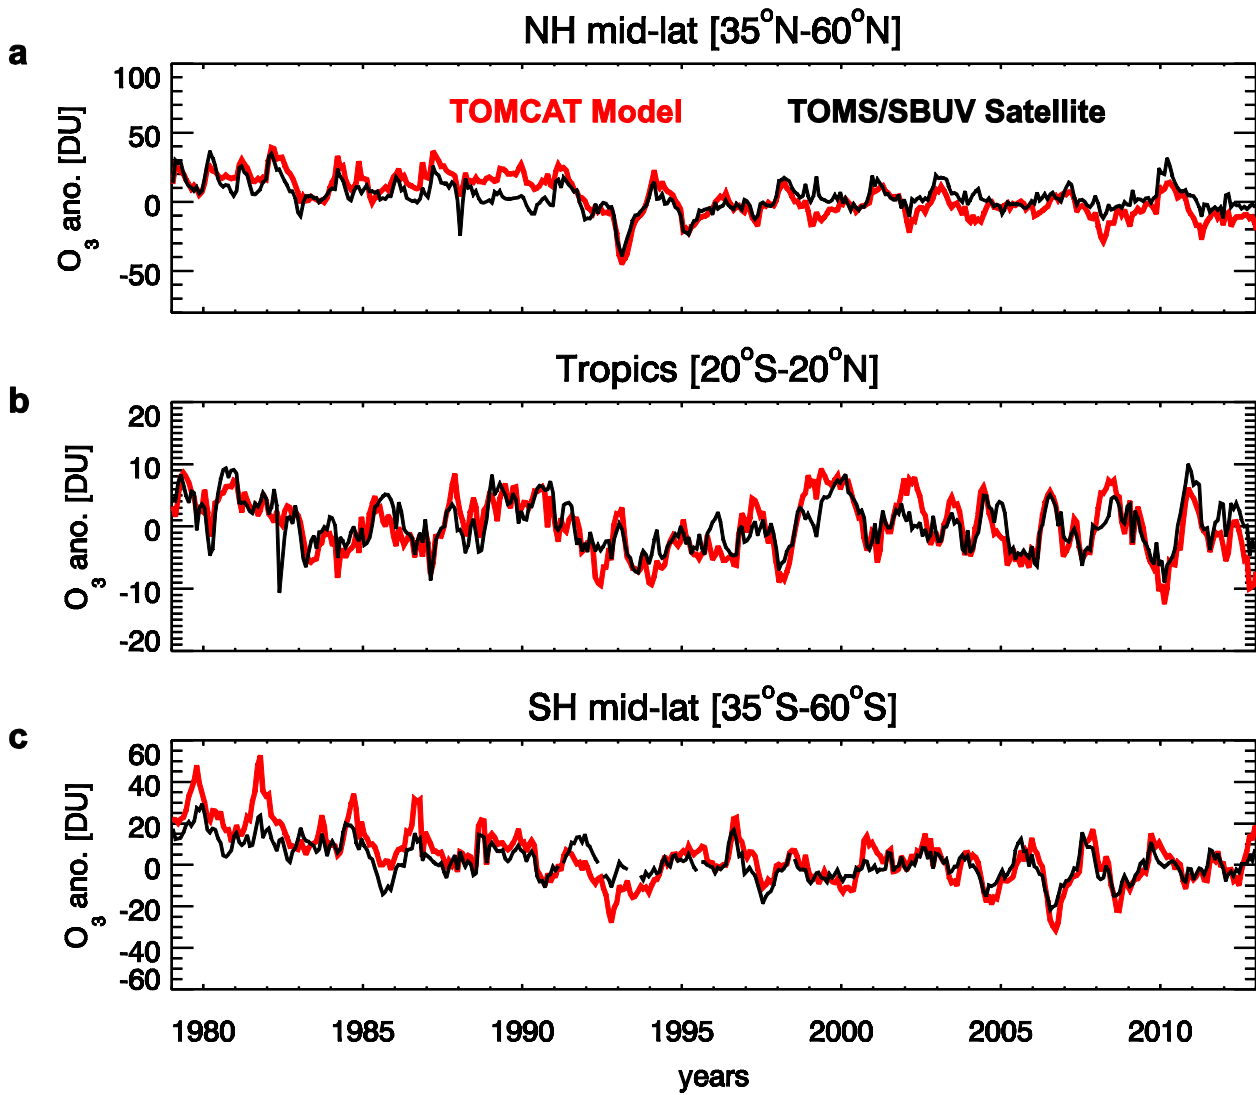

**Figure S2. Long-term ozone anomalies from observations and model.** Comparison of total ozone anomalies (Dobson Units) for (a) northern hemisphere mid-latitudes (35°N-60°N), (b) tropics (20°S-20°N) and (c) southern hemisphere mid-latitudes (35°S-60°S). Anomalies are calculated by subtracting climatological monthly mean column ozone values (1990-2005) from monthly mean values.

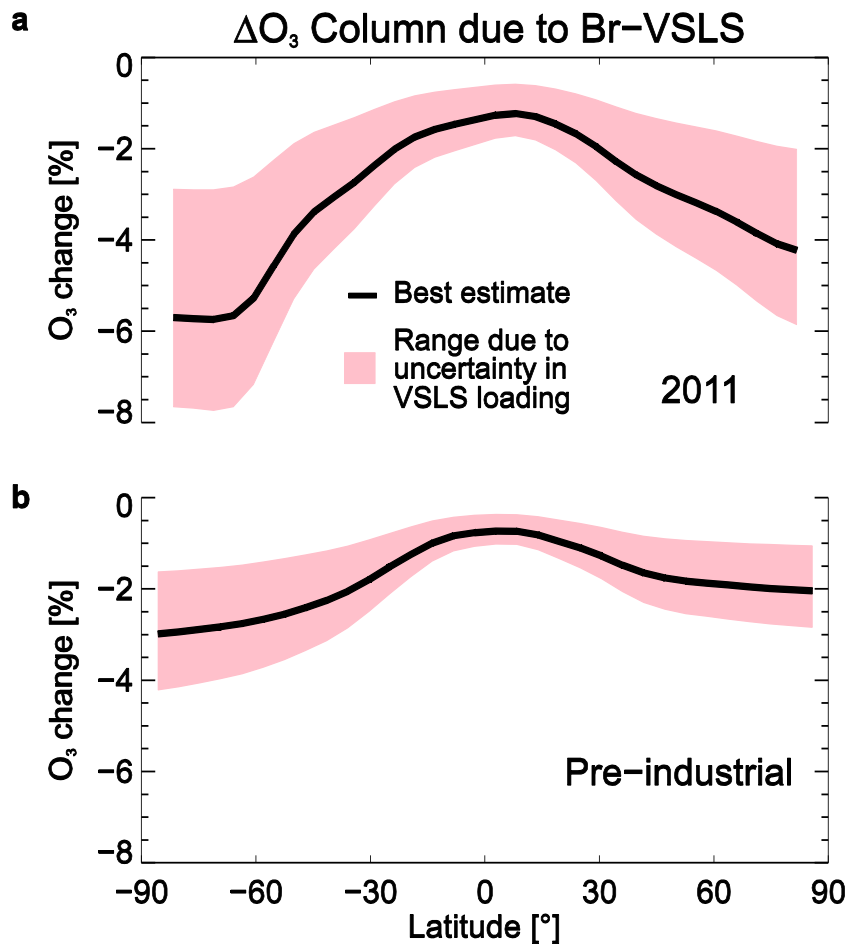

**Figure S3. Present day and pre-industrial impact of bromine VSLs on column ozone.** Simulated column ozone change (%) due to a best estimate of 6 parts per trillion (ppt) of bromine VSLs in the stratosphere relative to a run with no VSLs in (a) 2011 and (b) the pre-industrial stratosphere (background  $CH_3Br$  and  $CH_3Cl$  only). Globally averaged, the influence of bromine VSLs on column ozone is  $\sim 30\%$  smaller in the pre-industrial stratosphere. The shaded regions denote the range due to uncertainty in the stratospheric loading of bromine VSLs; simulations were also performed with 3 ppt and 8 ppt.

## Supplementary References

S1 Breider, T. J. et al. Impact of BrO on dimethylsulfide in the remote marine boundary layer. *Geophys. Res. Lett.*, **37**, L02807 (2010).

S2 Hossaini, R. et al. Evaluating global emission inventories of biogenic bromocarbons. *Atmos. Chem. Phys.* **13**, 11819-11838 (2013).

S3 Hossaini, R. et al. The contribution of natural and anthropogenic very short-lived species to stratospheric bromine. *Atmos. Chem. Phys.* **12**, 371-380 (2012).

S4 Ordóñez, C. et al. Bromine and iodine chemistry in a global chemistry-climate model: description and evaluation of very short-lived oceanic sources. *Atmos. Chem. Phys.* **12**, 1423-1447 (2012).

S5 Ziska, F. et al. Global sea-to-air flux climatology for bromoform, dibromomethane and methyl iodide. *Atmos. Chem. Phys.* **13**, 8915-8934 (2013).
